# Supplementary material for: A highly biocompatible CE-crosslinked collagen implant with exceptional anti-calcification and collagen regeneration capabilities for aging skin rejuvenation
Source: Royal Society of Chemistry journal article supplement (doi:10.1039/d3tb03032f), 2024-01-01
Supplement: d3tb03032f1.pdf [file d3tb03032f1.pdf]

# A Highly Biocompatible CE-Crosslinked Collagen Implant with Exceptional Anti-Calcification and Collagen Regeneration Capabilities for Aging Skin Rejuvenation

Qi Wang<sup>a,b, #</sup>, Huiyu Yan<sup>a,b, #</sup>, Linyan Yao<sup>a,b</sup>, Wenhua Li<sup>a,b</sup> and Jianxi Xiao<sup>a,b\*</sup>

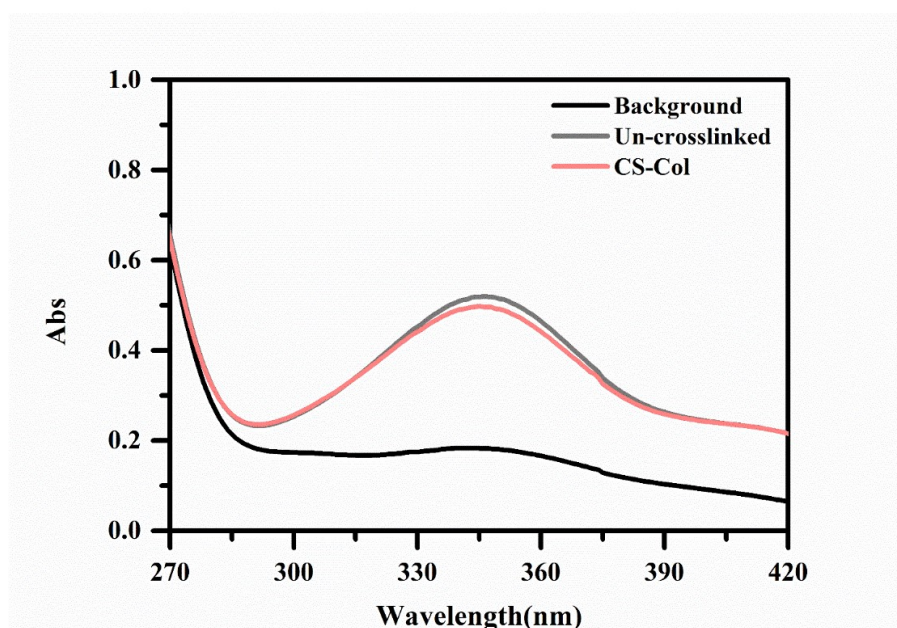

**Fig. S1** The determination curve of the degree of crosslinking between chondroitin sulfate (CS) and collagen.

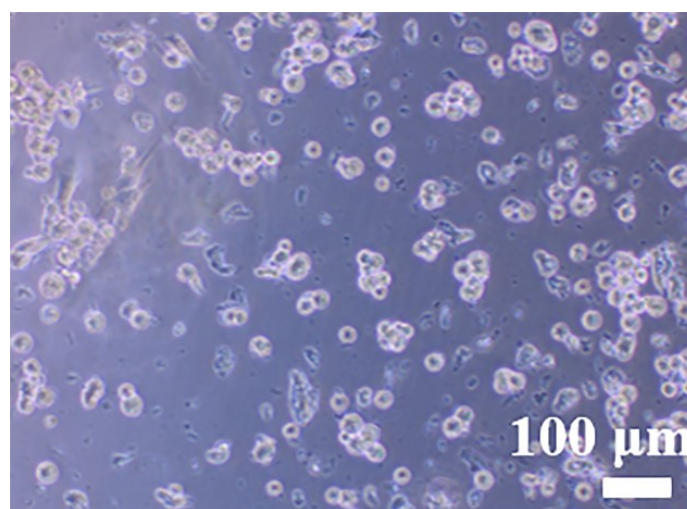

**Fig. S2** The Cellular adhesion of PBS.

**Table S1** The hemocompatibility of CE-crosslinked collagen implant

| <b>Material</b>   | <b>Number</b> | <b>Hemolysis rate (%)</b> | <b>Mean hemolysis rate (%)</b> |
|-------------------|---------------|---------------------------|--------------------------------|
| <b>0.9%Saline</b> | <b>1</b>      | <b>0</b>                  | <b>0</b>                       |
|                   | <b>2</b>      | <b>0</b>                  |                                |
|                   | <b>3</b>      | <b>0</b>                  |                                |
| <b>Col</b>        | <b>1</b>      | <b>1.05</b>               | <b>1.08</b>                    |
|                   | <b>2</b>      | <b>1.10</b>               |                                |
|                   | <b>3</b>      | <b>1.10</b>               |                                |
| <b>Col-CE</b>     | <b>1</b>      | <b>1.50</b>               | <b>1.45</b>                    |
|                   | <b>2</b>      | <b>1.41</b>               |                                |
|                   | <b>3</b>      | <b>1.45</b>               |                                |
